# Supplementary material for: Highly efficient photothermal sterilization of water mediated by Prussian blue nanocages
Source: Royal Society of Chemistry journal article supplement (doi:10.1039/c7en01245d), 2018-01-01
Supplement: c7en01245d1.pdf [file c7en01245d1.pdf]

## Electronic Supplementary Information

### Highly efficient photothermal sterilization in water mediated by Prussian blue nanocages

Tingting Jiang,<sup>a</sup> Jiaojie He,<sup>b</sup> Lei Sun,<sup>a</sup> Yuanlin Wang,<sup>a</sup> Zhenglin Li,<sup>a</sup> Qiao Wang,<sup>b</sup> Ye  
Sun,<sup>c</sup> Wei Wang,<sup>\*b</sup> and Miao Yu<sup>\*a</sup>

<sup>a</sup> State Key Laboratory of Urban Water Resource and Environment, School of Chemistry and Chemical Engineering, Harbin Institute of Technology, Harbin 150001, China

<sup>b</sup> State Key Laboratory of Urban Water Resource and Environment, School of Environment, Harbin Institute of Technology, Harbin 150090, China

<sup>c</sup> Condensed Matter Science and Technology Institute and Department of Physics, School of Science, Harbin Institute of Technology, Harbin 150080, China

\*Corresponding authors

Email address: miaoyu\_che@hit.edu.cn (Y. Miao), wangweirs@hit.edu.cn (W. Wang).

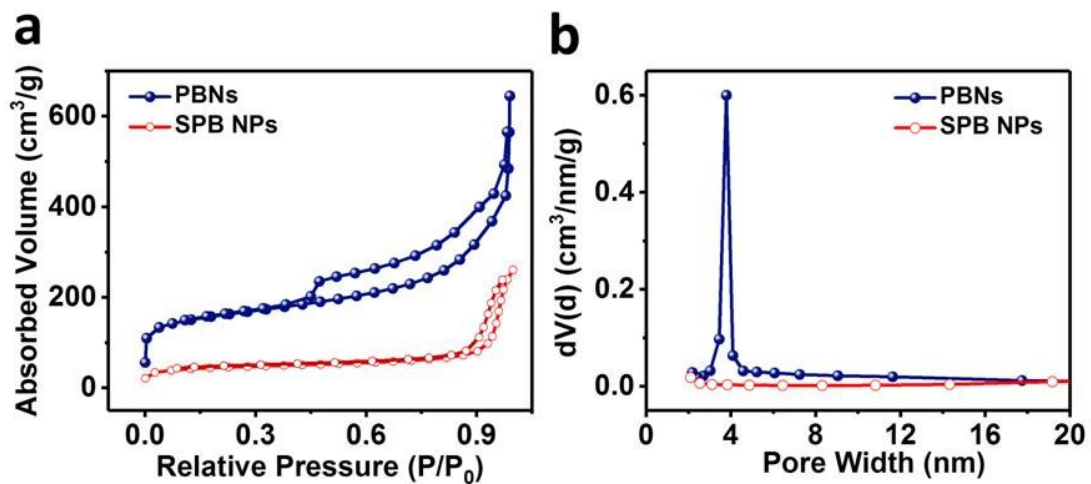

Fig. S1 (a) Nitrogen adsorption-desorption isotherm and (b) pore size distribution of both the PBN and SPB samples.

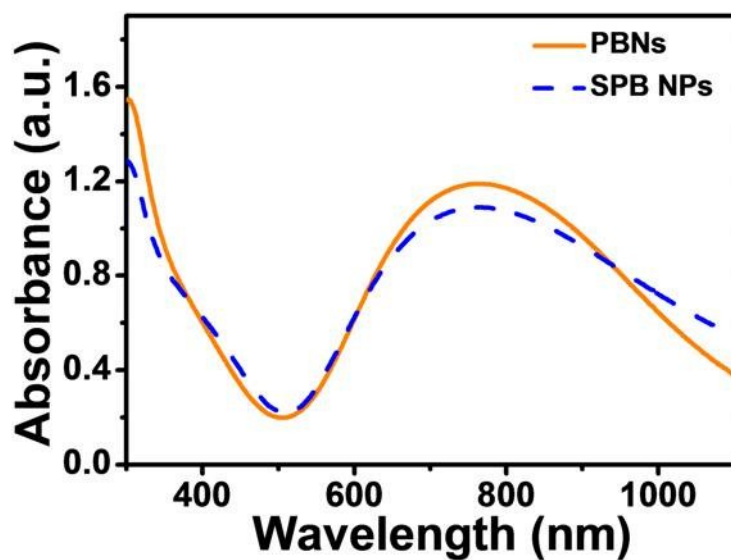

Fig. S2 UV-vis-NIR absorption spectra of the PBNs and SPB NPs.

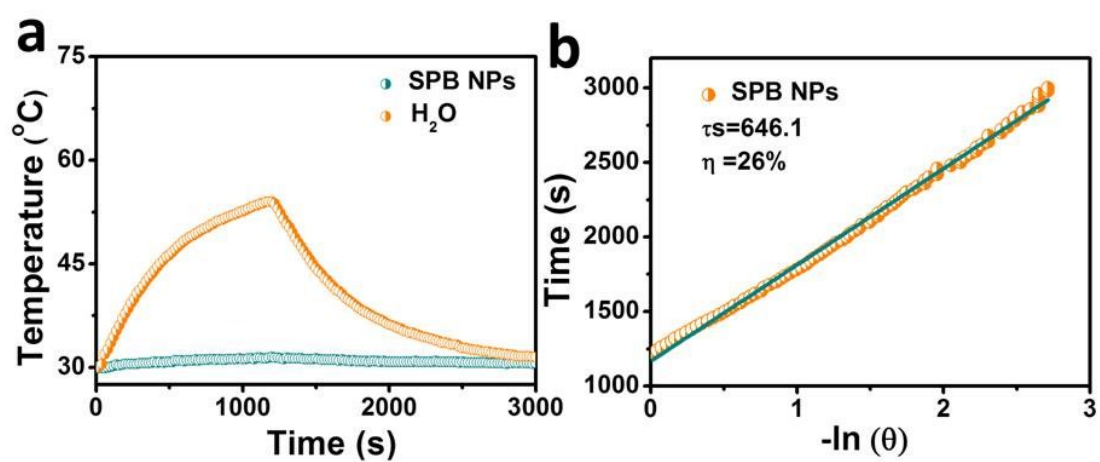

**Fig. S3** (a) Heating and cooling curves of the SPB NPs dispersion (100 μg/mL, 3 mL). (b) Plot of cooling time *versus* negative natural logarithm of the temperature driving force, which is obtained from the cooling period shown in panel a.

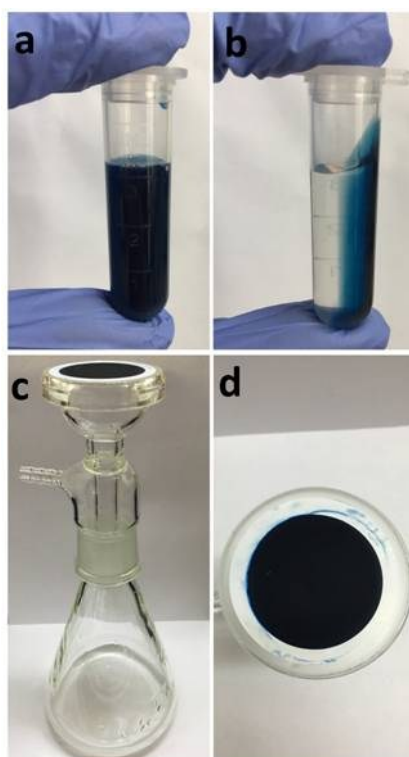

**Fig. S4** Photographs of PBNs (a) before and (b) after centrifugation, (c-d) Collection of PBNs by filtration.
